# Supplementary material for: Thermal and Antioxidant Properties of Polysaccharides Sequentially Extracted from Mulberry Leaves (Morus alba L.)
Source: PubMed Central journal article supplement (PMC6149993; doi:10.3390/molecules22122271), 2017-12-20
Supplement: molecules-22-02271-s001.pdf [file molecules-22-02271-s001.pdf]

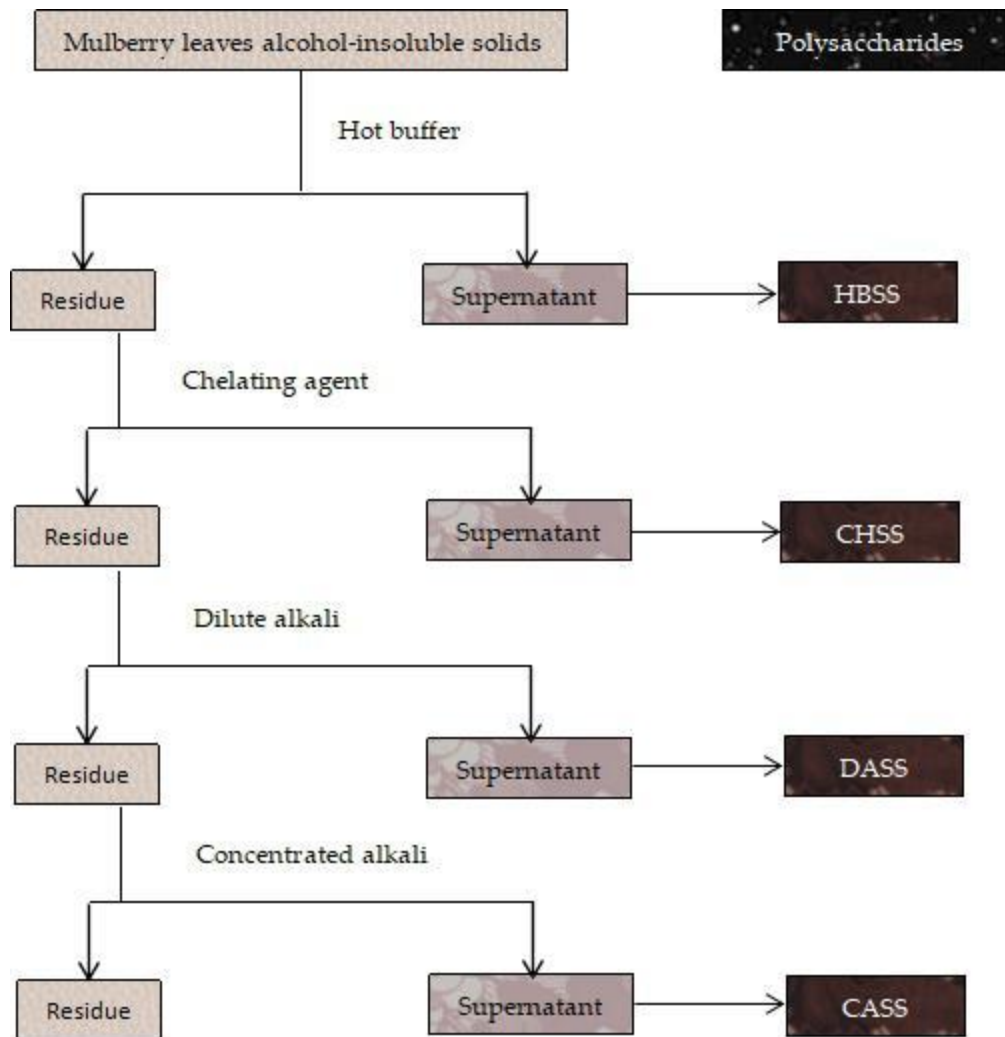

Supplement Figure 1: Flow diagram of extraction procedure for different polysaccharides fractions
